# Supplementary material for: Explicit description of viral capsid subunit shapes by unfolding dihedrons
Source: PubMed Central journal article supplement (PMC11564659; doi:10.1038/s42003-024-07218-x), 2024-11-14
Supplement: 42003_2024_7218_MOESM3_ESM.pdf [file 42003_2024_7218_MOESM3_ESM.pdf]

## Description of additional supplementary file

1  
2  
3  
4  
5  
6  
7  
8  
9  
10

**File name: Supplementary Movie 1.**

**Description:** Unfolding of a dihedron when the junction point is inside the triangle.

**File name: Supplementary Movie 2.**

**Description:** Unfolding of a dihedron when the junction point is outside the triangle.

**File name: Supplementary Movie 3.**

**Description:** Unfolding of a dihedron. Cutting along a complex curve.
